# Supplementary material for: Controlled synthesis of Gd2(WO4)3 microstructures and their tunable photoluminescent properties after Eu3+/Tb3+ doping
Source: Royal Society of Chemistry journal article supplement (doi:10.1039/c2ce26077h), 2012-01-01
Supplement: c2ce26077h.pdf [file c2ce26077h.pdf]

## Supporting Information

### Controlled Synthesis of $\text{Gd}_2(\text{WO}_4)_3$ Microstructures and Their Tunable Photoluminescent Properties

*Yubin Zeng, Zhengquan Li,\* Limin Wang and Yujie Xiong\**

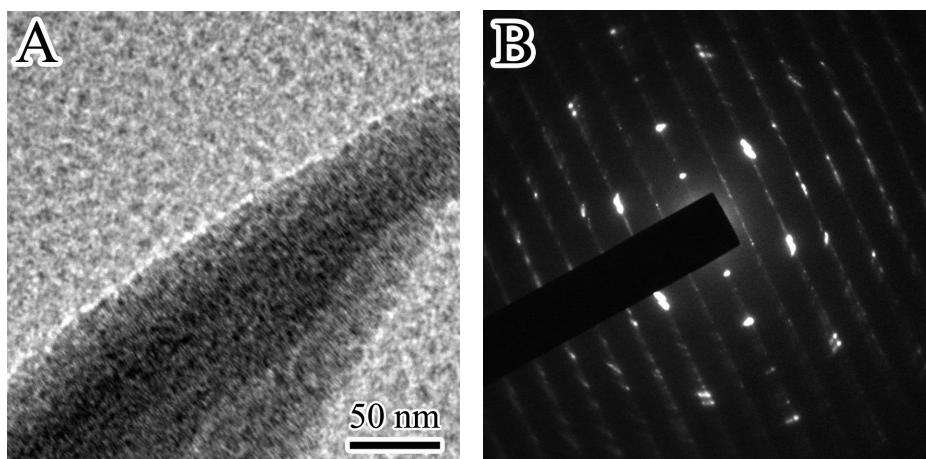

**Figure S1.** Typical TEM image (A) and corresponding SEAD pattern (B) of a single leaf in a microstar. The leaf was obtained with an ultrasonic treatment on the microstars in ethanol. The SEAD pattern of the leaf is much similar to that of the microbelts (refer to Fig. 3B), suggesting that they have very similar structural characteristics.

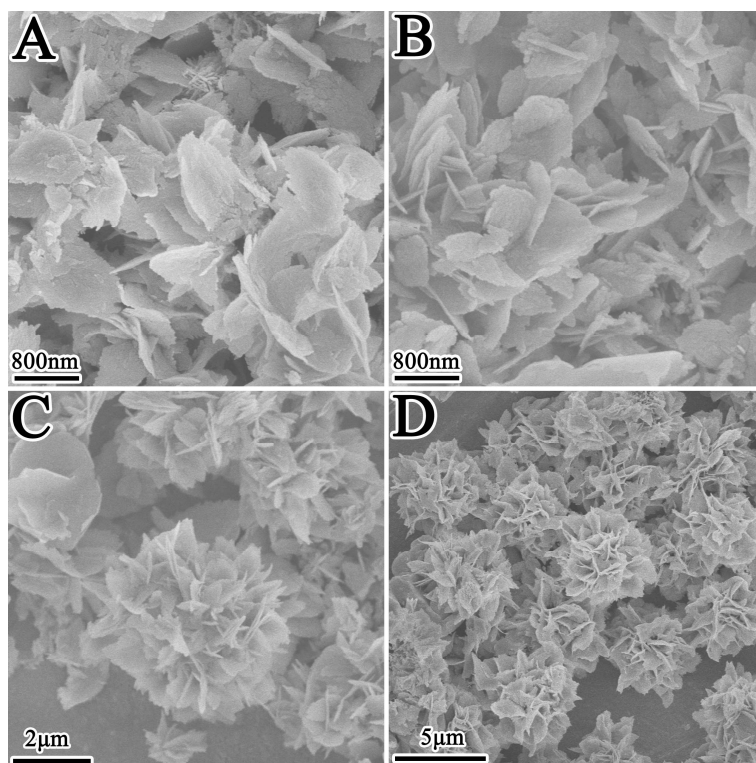

**Figure S2.** SEM images of intermediate products obtained during the synthesis of  $\text{Gd}_2(\text{WO}_4)_3$  microflowers. The samples were collected at different time intervals: (A) 6 h; (B) 12 h; (C) 24 h; (D) 36 h. These images show that the  $\text{Gd}_2(\text{WO}_4)_3$  microflowers were gradually assembled by thin nanosheets that were initially formed upon the addition of surfactant CTAB.

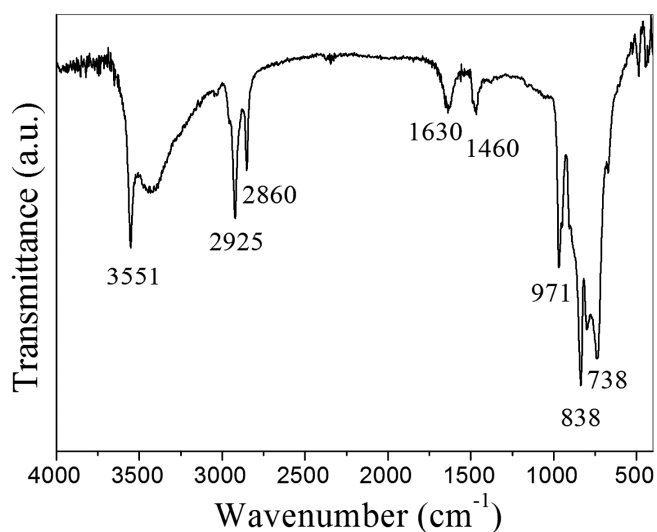

**Figure S3.** FTIR spectrum of Gd<sub>2</sub>(WO<sub>4</sub>)<sub>3</sub> microflowers. The peaks at 738 cm<sup>-1</sup>, 838 cm<sup>-1</sup> and 971 cm<sup>-1</sup> are attributed to WO<sub>4</sub><sup>2-</sup> group, while the peaks at 1630 cm<sup>-1</sup> and 3420 cm<sup>-1</sup> can be assigned to adsorbed water on surface. The peaks at 3551 cm<sup>-1</sup>, 2925 cm<sup>-1</sup>, 2860 cm<sup>-1</sup> and 1460 cm<sup>-1</sup> are from -N(CH<sub>3</sub>)<sub>3</sub> and -CH<sub>2</sub>- groups of CTA<sup>+</sup> ions, suggesting the existence of CTAB on Gd<sub>2</sub>(WO<sub>4</sub>)<sub>3</sub> microflowers due to strong gravitation between CTA<sup>+</sup> and WO<sub>4</sub><sup>2-</sup>.

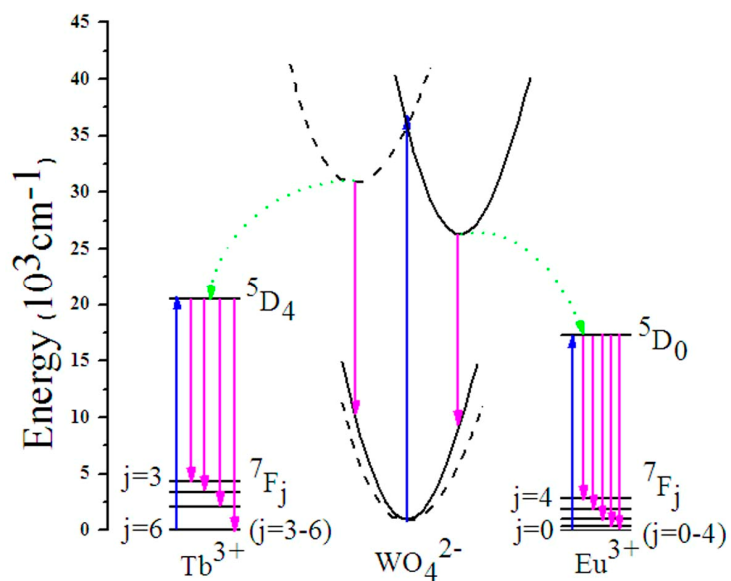

**Figure S4.** Schematic diagram of energy transfer in the  $\text{Eu}^{3+}$  and/or  $\text{Tb}^{3+}$  doped  $\text{Gd}_2(\text{WO}_4)_3$  microstructures. The  $\text{WO}_4^{2-}$  group has a wide and strong absorption band around 270 nm, and can effectively transfer energy to  $\text{Tb}^{3+}$  and  $\text{Eu}^{3+}$  ions and give multicolor visible emissions.
